# Supplementary material
Source: Springer Nature journal article supplement (https://www.springermedizin.de/resource/supplementary/12891_2009_787_MOESM2_ESM.pdf/9507010)

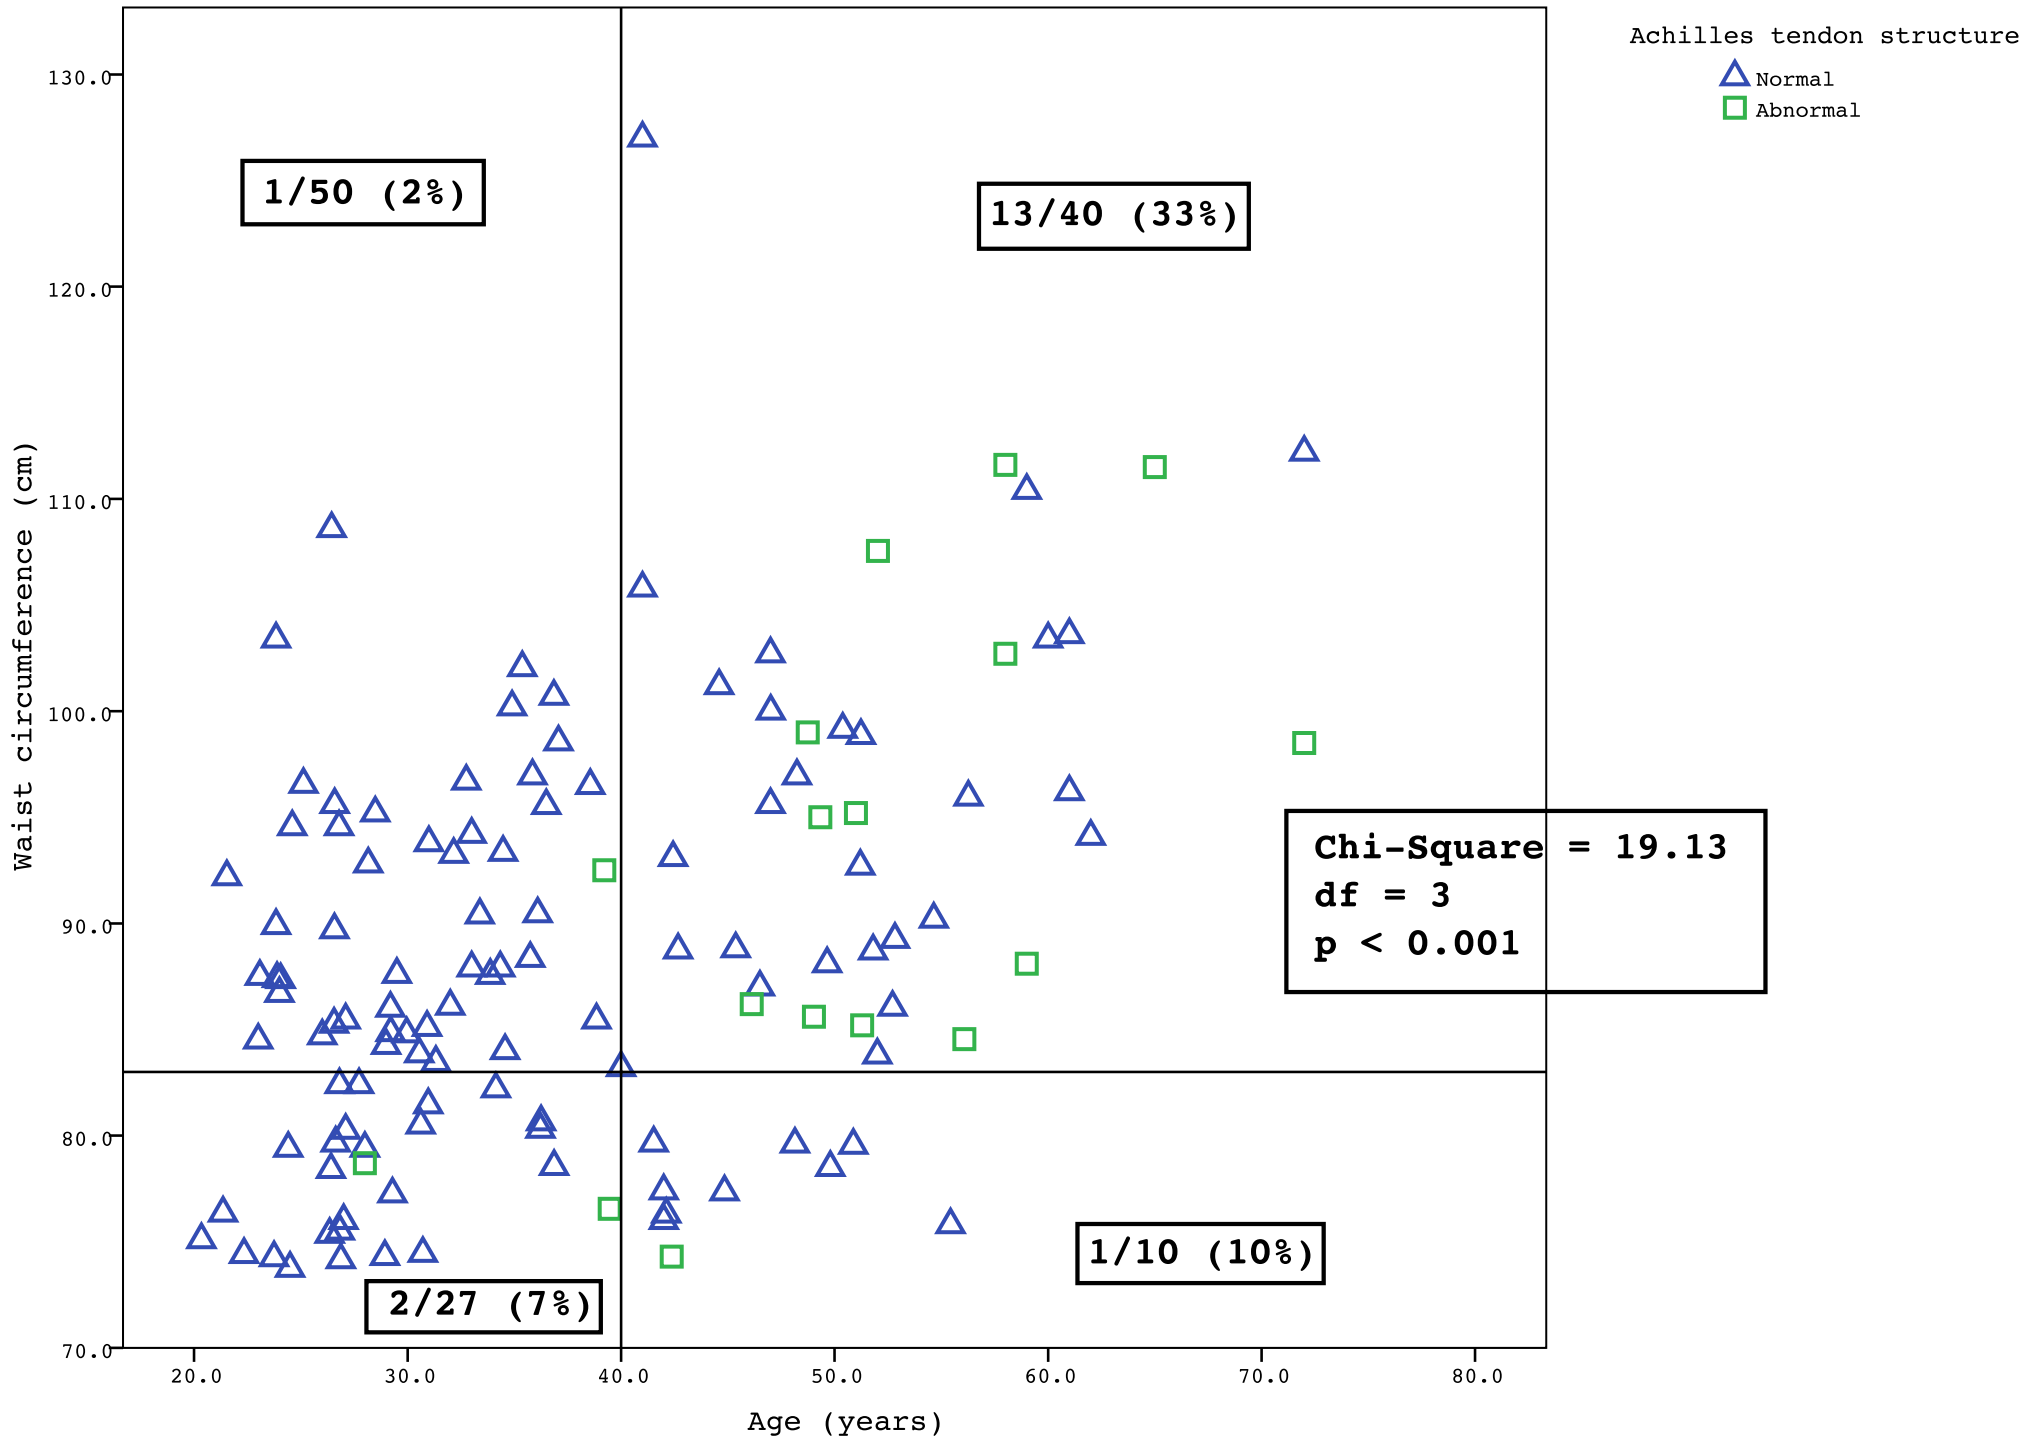

Supplement: MOESM2 [file 9507010]
